# Supplementary material for: Oseltamivir Population Pharmacokinetics in the Ferret: Model Application for Pharmacokinetic/Pharmacodynamic Study Design
Source: PLOS journal article supplement (doi:10.1371/journal.pone.0138069), 2015-10-13

## S1 Fig. Individual ferret pharmacokinetic data used for model development.

For additional details (e.g., doses that ferrets received), see S1 Table.

**Study 1: Ferrets with IDs beginning with TA were infected with H5N1, TB with H3N2 and TC were infected with H5N1, except for ferrets TC-004, TC-005 and TC-008, which were uninfected.**

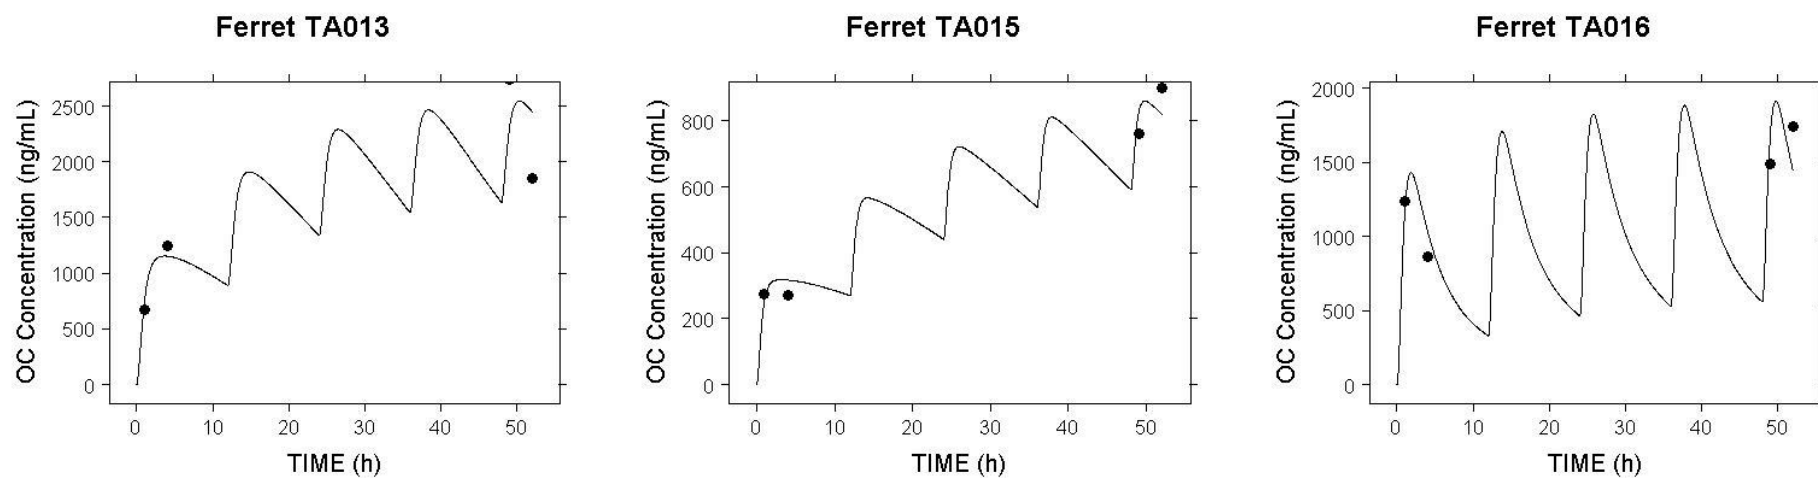

**Ferret TA018**

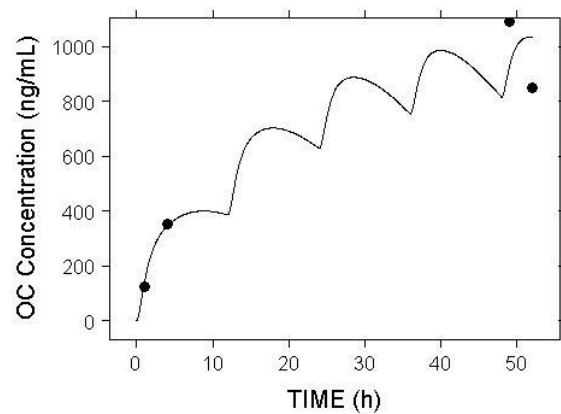

**Ferret TA019**

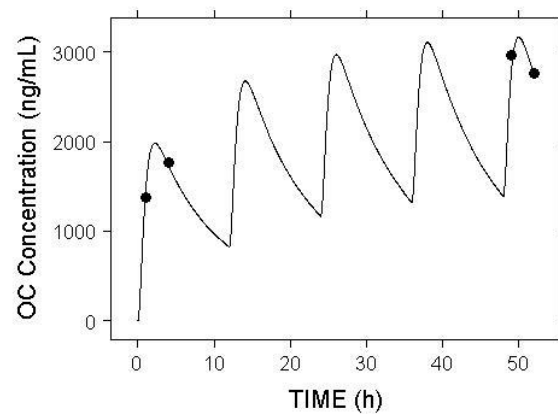

**Ferret TA020**

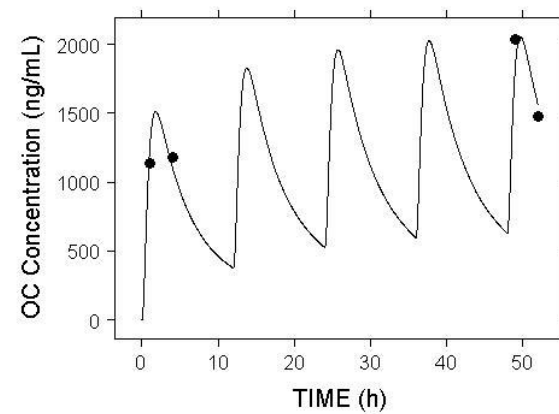

**Ferret TA021**

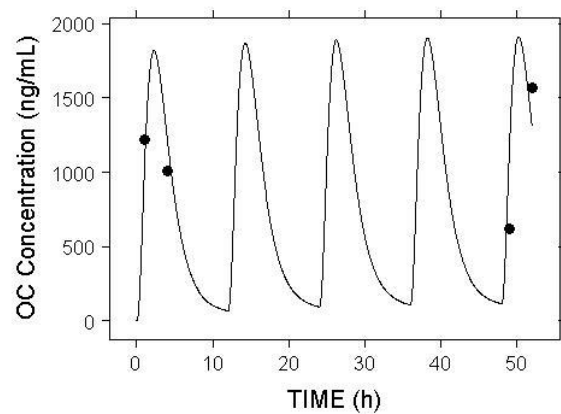

**Ferret TA023**

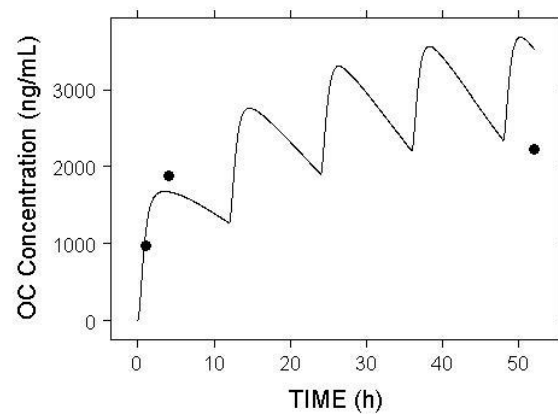

**Ferret TA024**

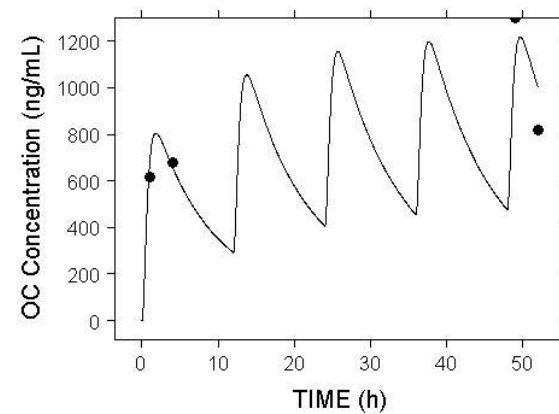

**Ferret TA025**

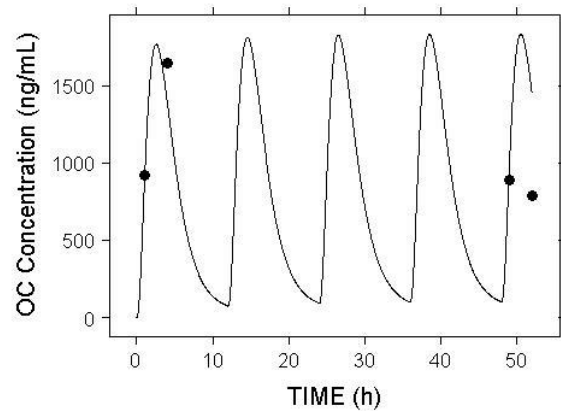

**Ferret TA026**

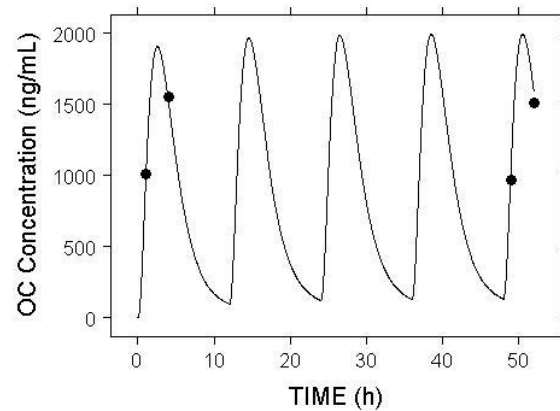

**Ferret TA027**

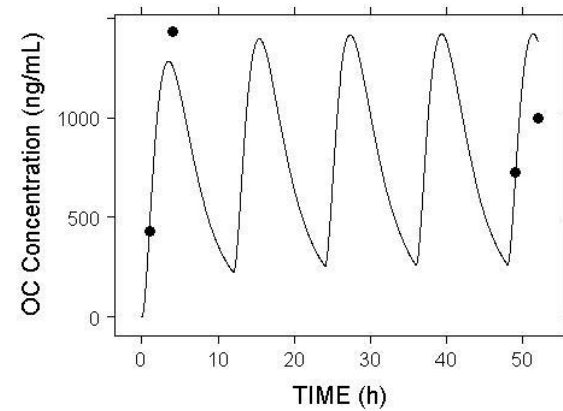

**Ferret TB014**

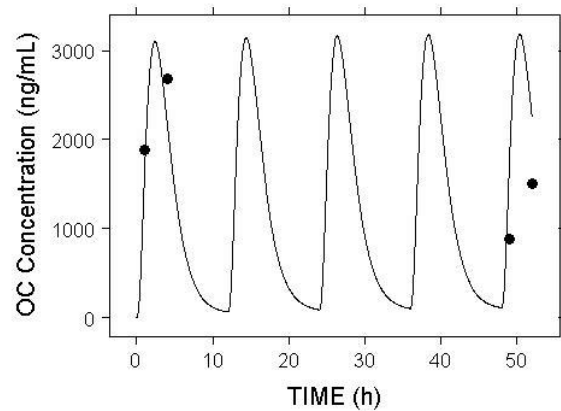

**Ferret TB016**

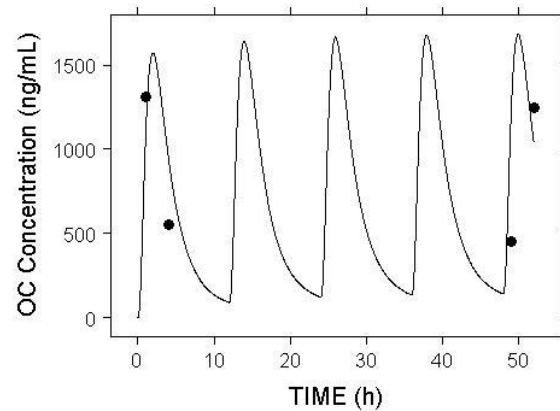

**Ferret TB017**

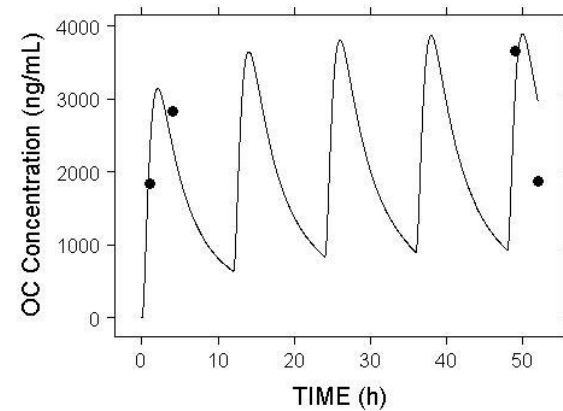

**Ferret TB018**

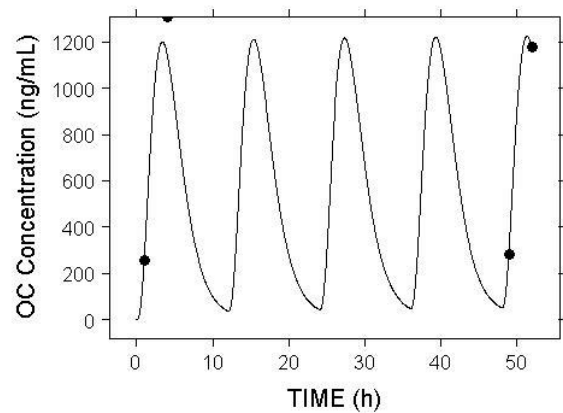

**Ferret TB020**

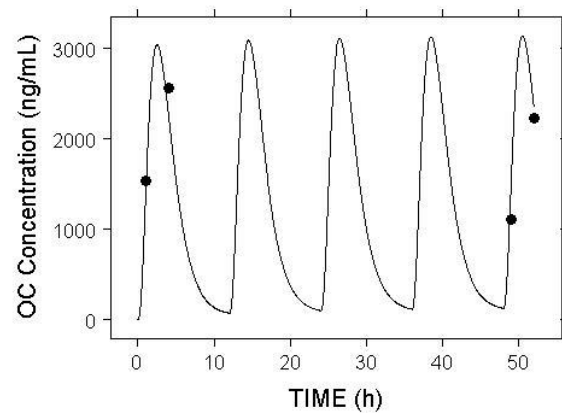

**Ferret TB021**

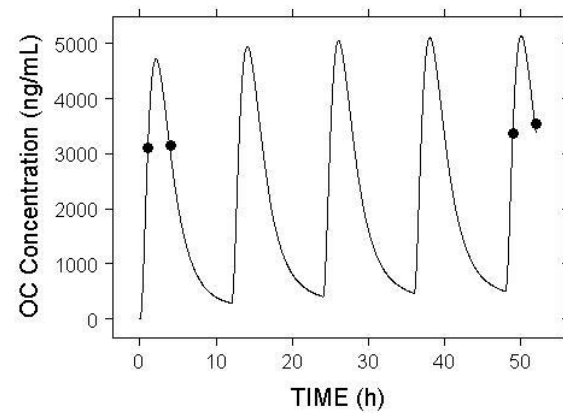

**Ferret TB022**

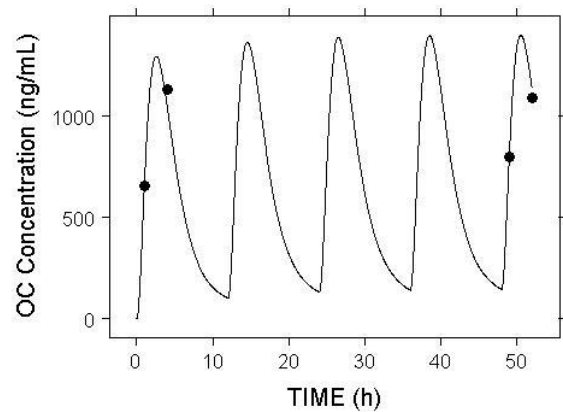

**Ferret TB023**

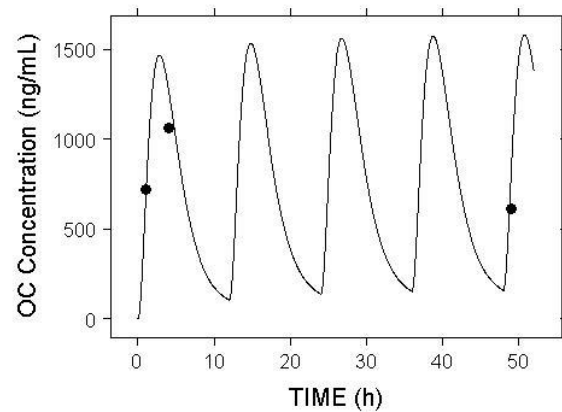

**Ferret TB024**

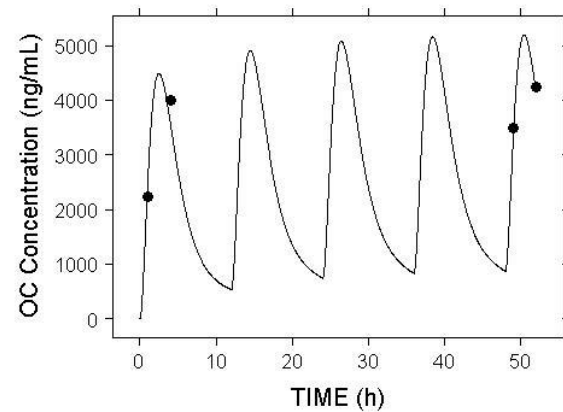

**Ferret TB026**

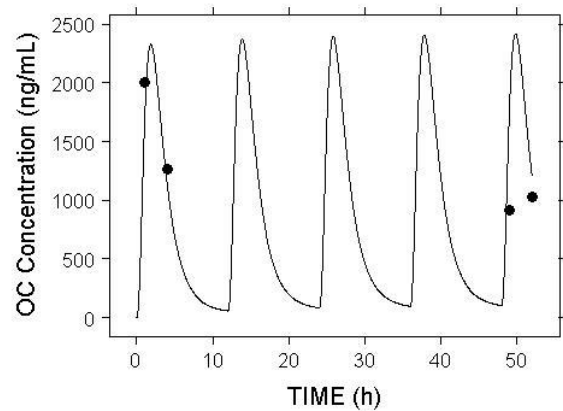

**Ferret TB029**

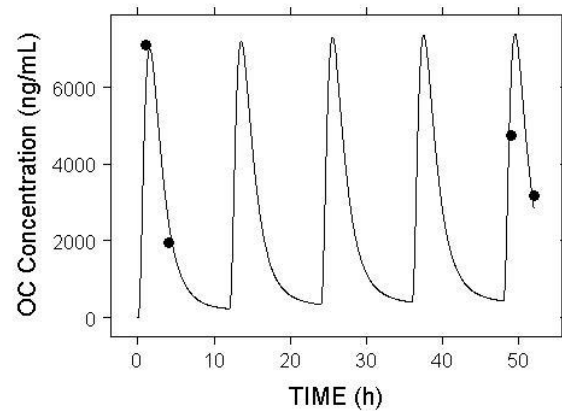

**Ferret TB030**

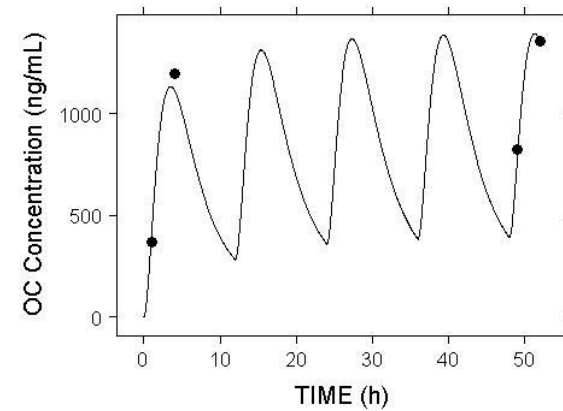

**Ferret TC002**

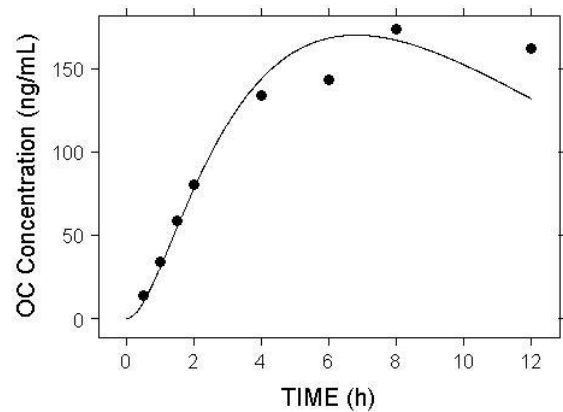

**Ferret TC003**

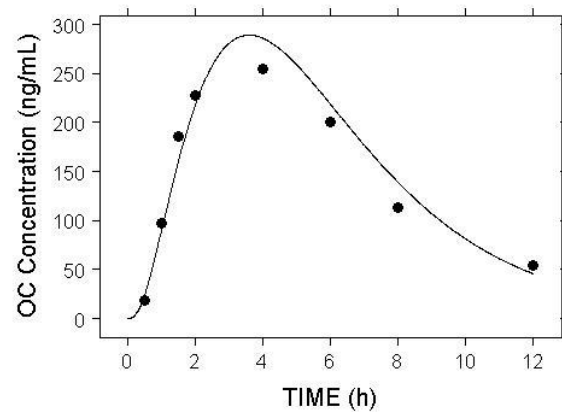

**Ferret TC004**

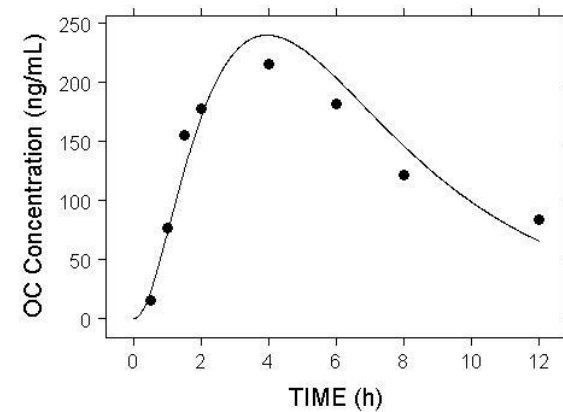

**Ferret TC005**

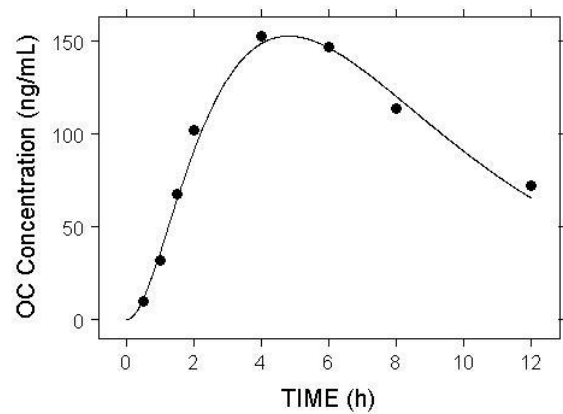

**Ferret TC006**

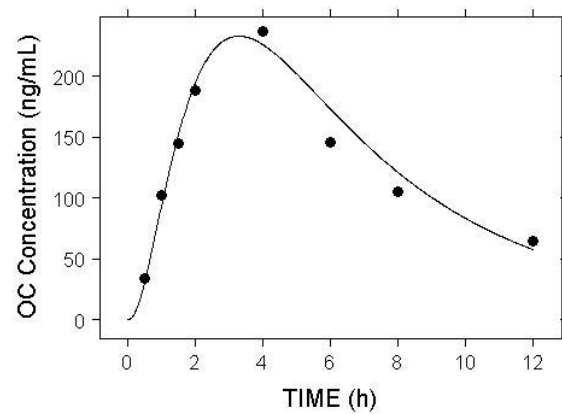

**Ferret TC007**

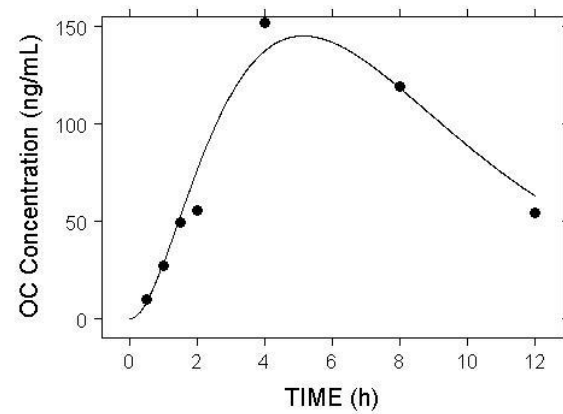

**Ferret TC008**

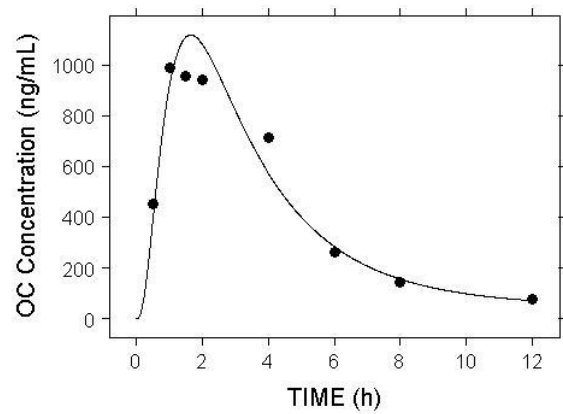

**Ferret TC009**

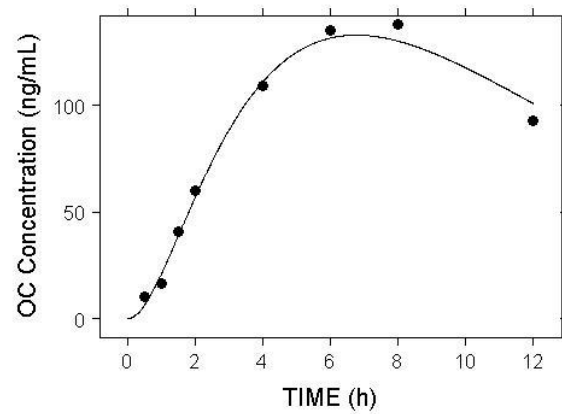

**Ferret TC010**

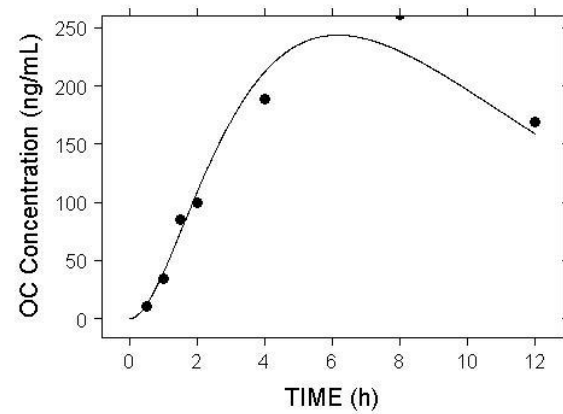

**Study 2: Ferrets 1-6 were uninfected and ferrets 7-24 were infected with influenza B virus.**

**Ferret 1**

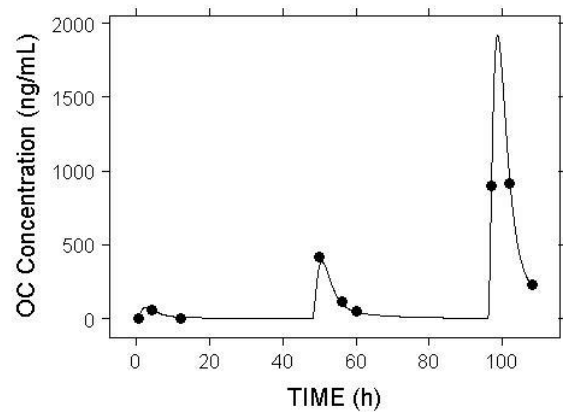

**Ferret 2**

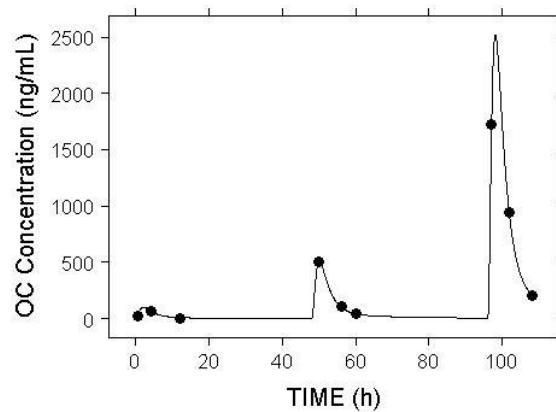

**Ferret 3**

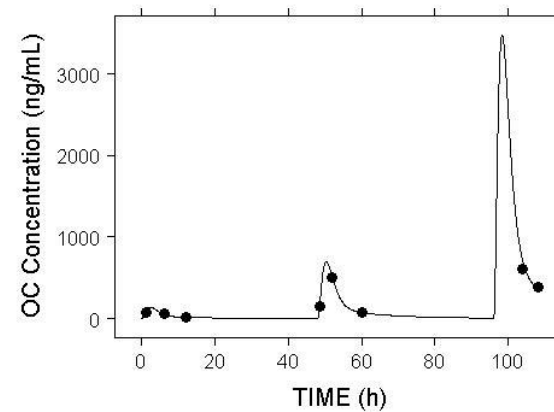

**Ferret 4**

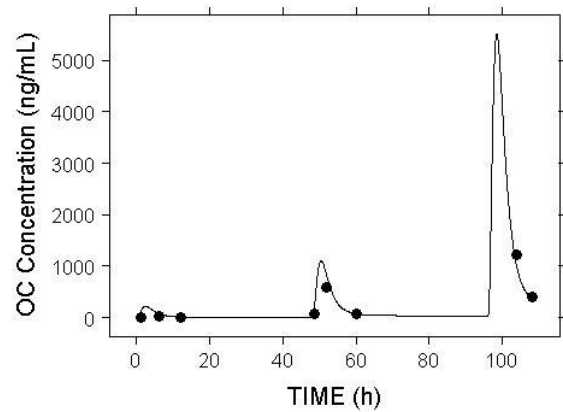

**Ferret 5**

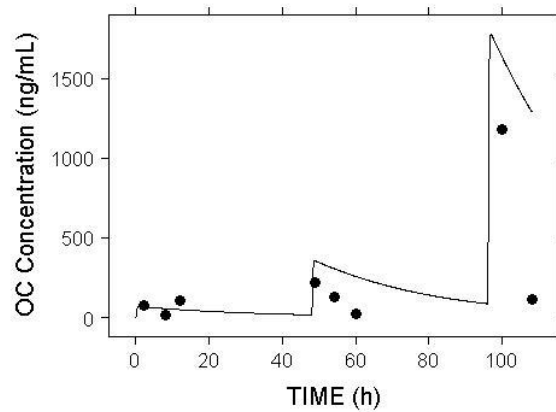

**Ferret 6**

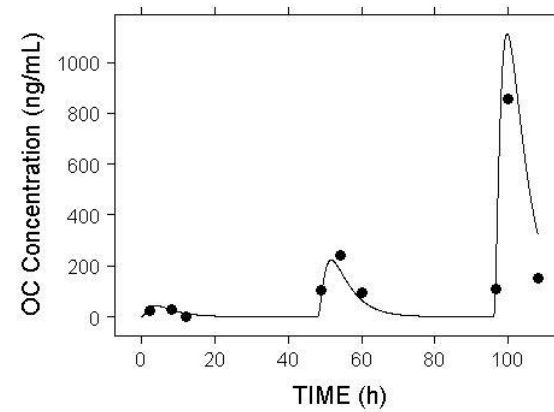

**Ferret 7**

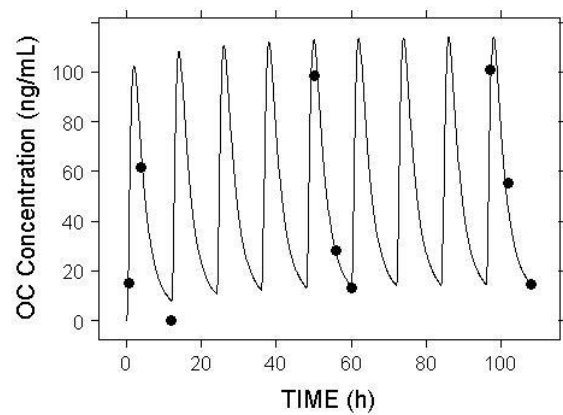

**Ferret 8**

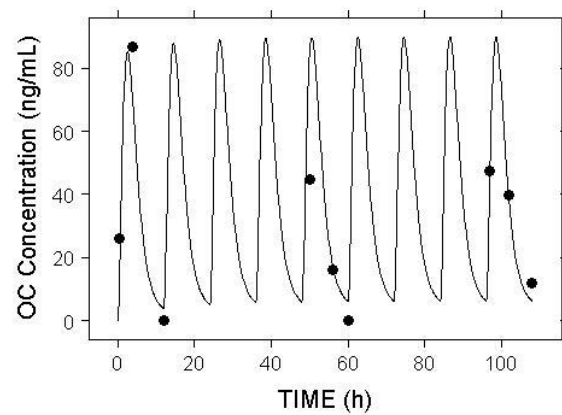

**Ferret 9**

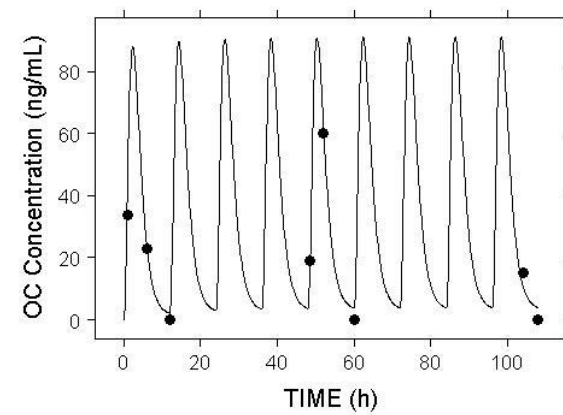

**Ferret 10**

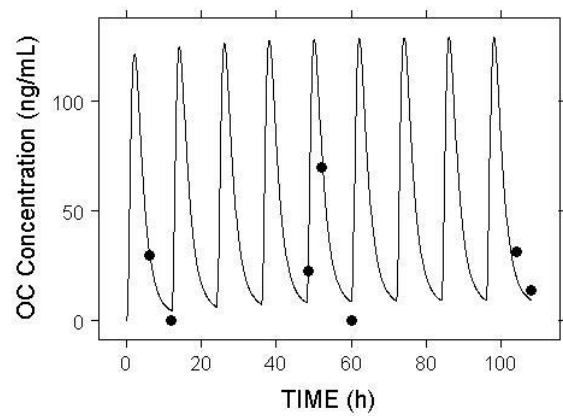

**Ferret 11**

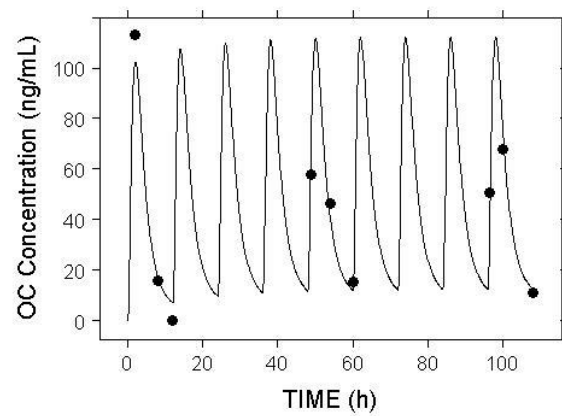

**Ferret 12**

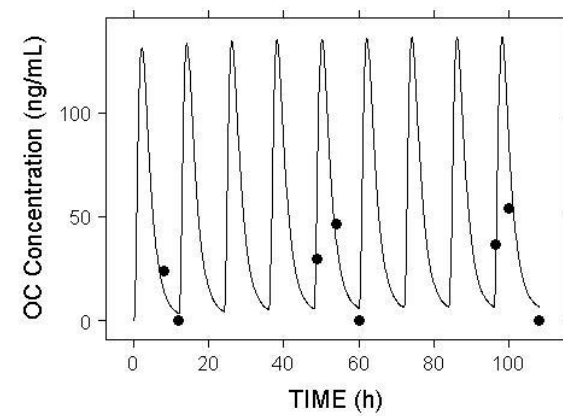



**Ferret 13**

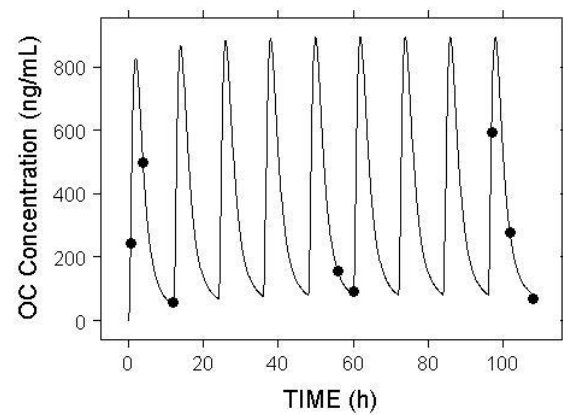

**Ferret 14**

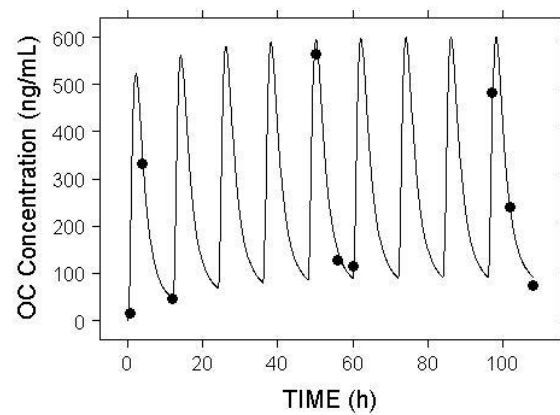

**Ferret 15**

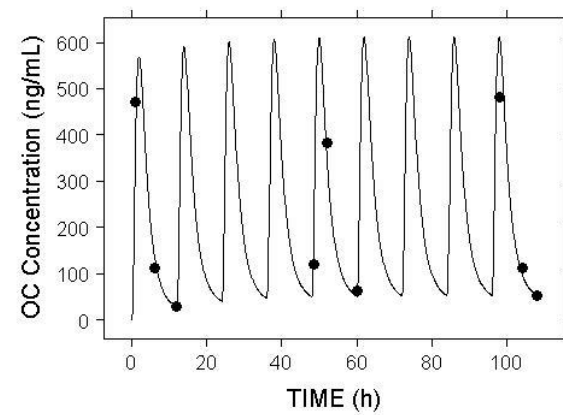

**Ferret 16**

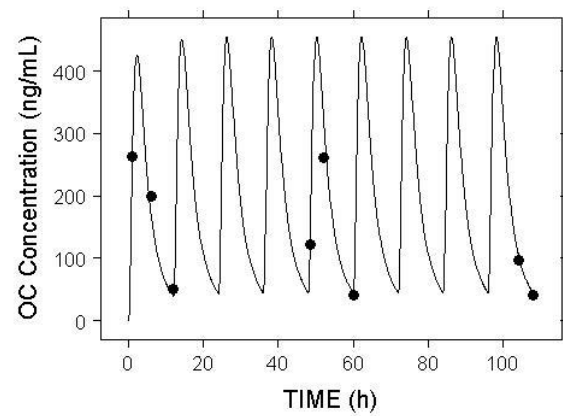

**Ferret 17**

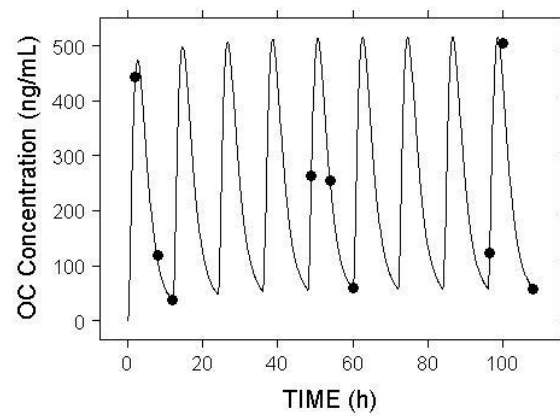

**Ferret 18**

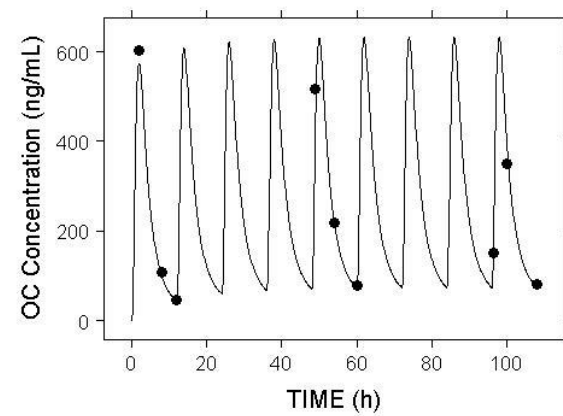

**Ferret 19**

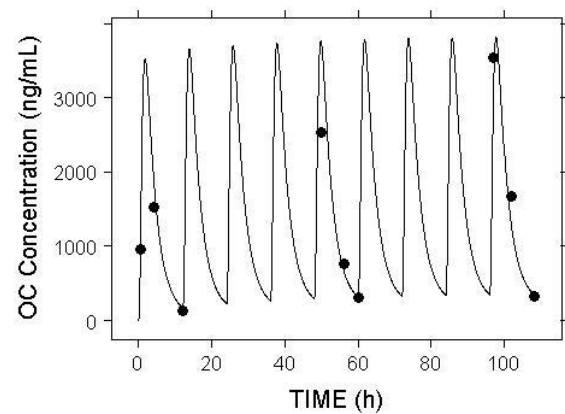

**Ferret 20**

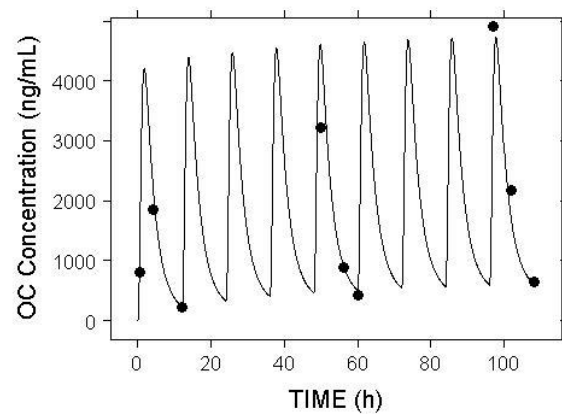

**Ferret 21**

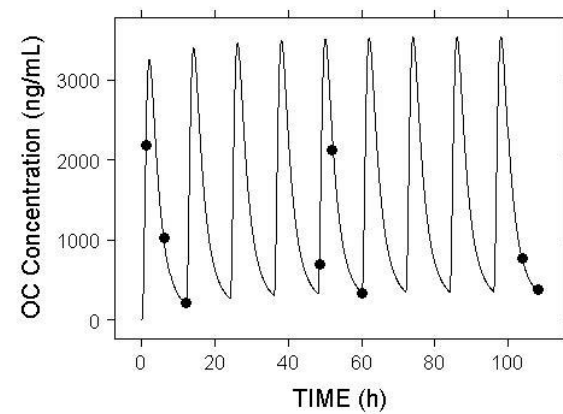

**Ferret 22**

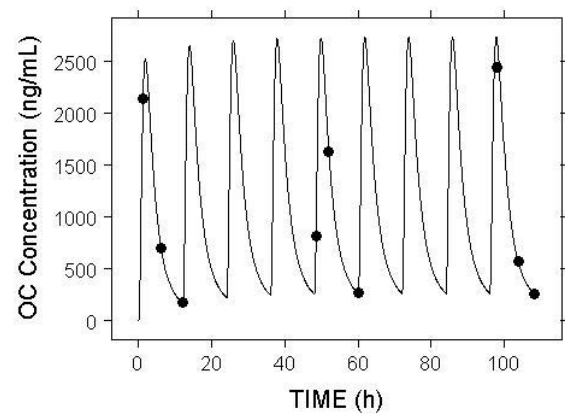

**Ferret 23**

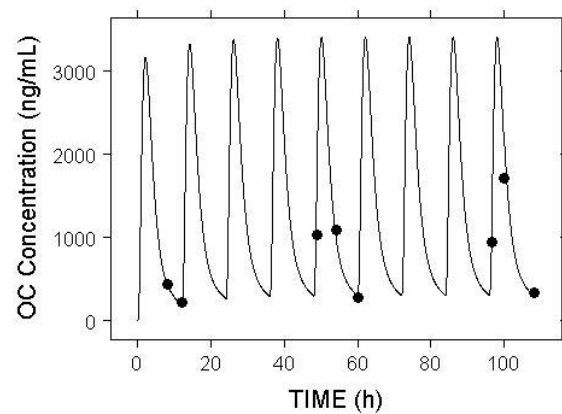

**Ferret 24**

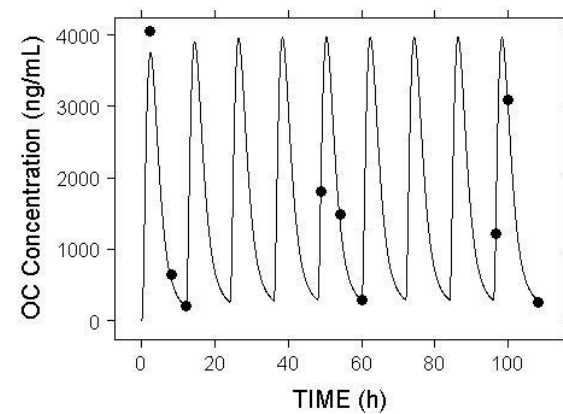

**Study 3: Ferrets were uninfected.**

**Ferret 13**

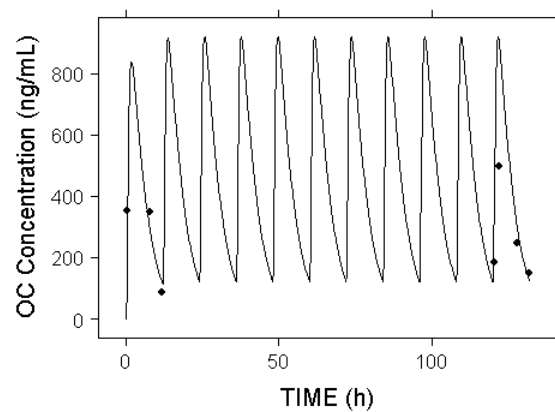

**Ferret 106**

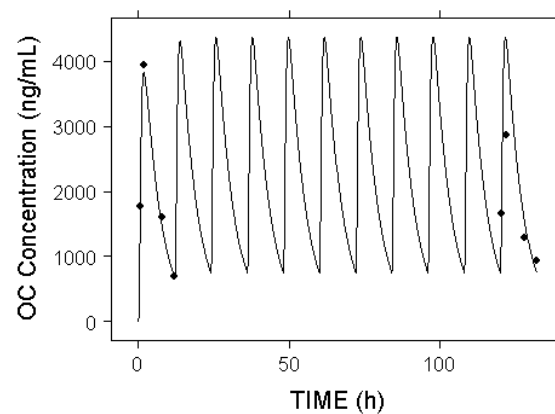

**Ferret 115**

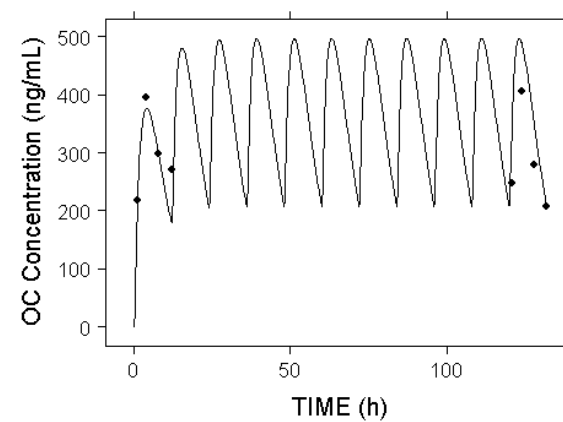

**Ferret 303**

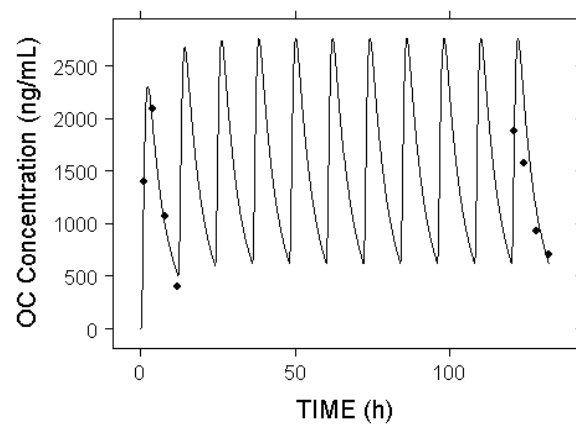

**Ferret 306**

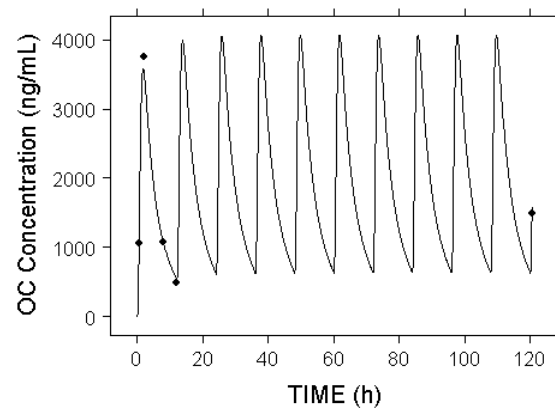

**Ferret 330**

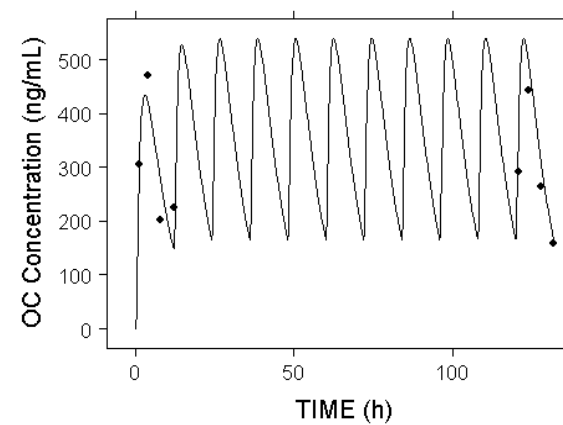

**Ferret 343**

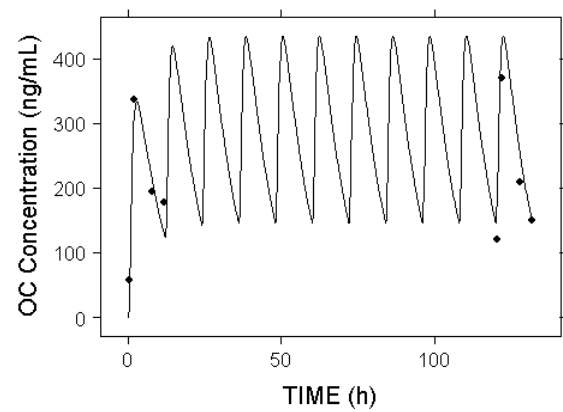

**Ferret 610**

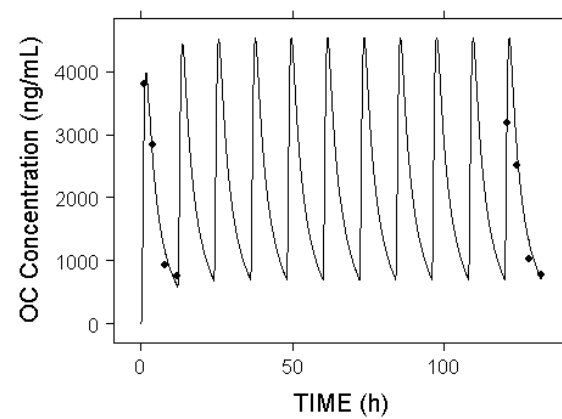

Supplement: S1 (10.1371/journal.pone.0138069.s001) [file journal.pone.0138069.s001]
